# Supplementary material for: Viral testing of 10 cases of Theiler's disease and 37 in‐contact horses in the absence of equine biologic product administration: A prospective study (2014‐2018)
Source: PubMed Central journal article supplement — J Vet Intern Med. 2018 Dec 6;33(1):258–65. doi: 10.1111/jvim.15362 (PMC6335540; doi:10.1111/jvim.15362), 2018-12-06
Supplement: JVIM-33-258-s002.pdf [file JVIM-33-258-s002.pdf]

**Supplemental Table 1: Clinical data and virology results for each Theiler's disease case.** Chemistry values in bold were outside the reference interval.

| Case                     | a1                    | b1                  | c1                    | d1                   | d2                    | e1                    | e2                    | e3                   | e4                   | f1                       |
|--------------------------|-----------------------|---------------------|-----------------------|----------------------|-----------------------|-----------------------|-----------------------|----------------------|----------------------|--------------------------|
| Age (yrs)                | 12                    | 12                  | 7                     | 20                   |                       | 5                     | 16                    | 8                    | 7                    | 7                        |
| Breed                    | Arabian               | AQH                 | AQH                   | Welsh Pony           | Welsh Pony            | SB                    | SB                    | SB                   | SB                   | Arabian                  |
| Gender                   | Mare                  | Gelding             | Gelding               | Gelding              | Gelding               | Mare                  | Mare                  | Mare                 | Mare                 | Gelding                  |
| Outcome                  | Euthanized            | Euthanized          | Died                  | Euthanized           | Euthanized            | Euthanized            | Euthanized            | Euthanized           | Died                 | Euthanized               |
| Date of presentation     | Sept 21 <sup>st</sup> | May 6 <sup>th</sup> | July 30 <sup>th</sup> | May 15 <sup>th</sup> | June 23 <sup>rd</sup> | Sept 29 <sup>th</sup> | Sept 30 <sup>th</sup> | Nov 19 <sup>th</sup> | Nov 28 <sup>th</sup> | Oct 22 <sup>nd</sup>     |
| State of residence       | MO                    | KS                  | MO                    | NC                   |                       | NJ                    |                       |                      | WA                   |                          |
| <b>Serum qRT PCR</b>     |                       |                     |                       |                      |                       |                       |                       |                      |                      |                          |
| EqPV-H                   | +                     | NA                  | NA                    | +                    | +                     | NA                    | NA                    | NA                   | NA                   | NA                       |
| NPHV                     | -                     | NA                  | NA                    | -                    | -                     | NA                    | NA                    | NA                   | NA                   | NA                       |
| TDAV                     | -                     | NA                  | NA                    | -                    | -                     | NA                    | NA                    | NA                   | NA                   | NA                       |
| EPgV                     | +                     | NA                  | NA                    | -                    | -                     | NA                    | NA                    | NA                   | NA                   | NA                       |
| <b>Liver qRT PCR</b>     |                       |                     |                       |                      |                       |                       |                       |                      |                      |                          |
| EqPV-H                   | +                     | +                   | +                     | +                    | NA                    | +                     | +                     | +                    | +                    | -                        |
| NPHV                     | -                     | -                   | -                     | -                    | NA                    | -                     | -                     | -                    | -                    | -                        |
| TDAV                     | -                     | -                   | -                     | -                    | NA                    | -                     | -                     | -                    | -                    | -                        |
| EPgV                     | -                     | +                   | -                     | -                    | NA                    | -                     | -                     | -                    | -                    | -                        |
| <b>Liver variables</b>   |                       |                     |                       |                      |                       |                       |                       |                      |                      |                          |
| GGT (U/L)                | <b>117</b>            | <b>108</b>          | <b>137</b>            | <b>185</b>           | <b>144</b>            |                       | <b>114</b>            | <b>100</b>           | <b>97</b>            | <b>160</b>               |
| AST (U/L)                | <b>1595</b>           | <b>2275</b>         | <b>3953</b>           | <b>6177</b>          |                       | <b>3575</b>           | <b>4300</b>           | <b>1239</b>          | <b>1744</b>          | <b>&gt; linear range</b> |
| SDH (U/L)                |                       | <b>102</b>          |                       | 3.3                  |                       |                       |                       |                      |                      |                          |
| Total Bilirubin (mg/dl)  | <b>21.7</b>           | <b>21</b>           | <b>20.1</b>           | <b>14.9</b>          | <b>17.6</b>           | <b>20.0</b>           | <b>8.7</b>            |                      |                      | <b>20.4</b>              |
| Direct Bilirubin (mg/dl) | <b>7.9</b>            | <b>1.7</b>          | <b>2.3</b>            |                      |                       |                       |                       |                      |                      |                          |
| Bile acids (µmol/L)      | <b>176</b>            | <b>75.6</b>         |                       |                      |                       |                       | <b>90.4</b>           |                      |                      |                          |
| Ammonia (µmol/L)         |                       | <b>70</b>           |                       | <b>959</b>           | <b>high</b>           | <b>479</b>            | <b>326</b>            |                      |                      | <b>&gt;500</b>           |
| Glucose (mg/dl)          | <b>74</b>             | <b>67</b>           | <b>10</b>             | <b>45</b>            |                       | <b>33</b>             |                       |                      |                      | <b>33</b>                |
| Hematocrit (%)           | 52                    | 50                  | <b>58</b>             | <b>55</b>            |                       | <b>68</b>             | 49                    |                      |                      | <b>57</b>                |
